# Supplementary material for: Salmonella Typhimurium impairs glycolysis-mediated acidification of phagosomes to evade macrophage defense
Source: PubMed Central journal article supplement (PMC8491875; doi:10.1371/journal.ppat.1009943), 2021-09-23
Supplement: ppat.1009943.s009.pdf [file ppat.1009943.s009.pdf]

### S1 Table

Isotopically labeled internal standards were obtained from Cambridge Isotope Laboratory, Inc., USA (Ordered from Euroiso-Top, France). We have used total of 12 internal standards to compensate loss of metabolites either during extraction or analysis in mass spectrometry. List of internal standards with their concentration were given below:

| IST compound                                   | Concentration of Intermediate (ppm) |
|------------------------------------------------|-------------------------------------|
| L-Glutamic acid U-13C5                         | 487,042                             |
| L-Alanine D7                                   | 2075,637                            |
| L-Serine D3                                    | 118,775                             |
| L-ArginineHCL U-13C6                           | 370,232                             |
| L-Lysine:2HCL U-13C6                           | 372,591                             |
| L-Proline U-13C5, 15N                          | 454,225                             |
| L-Phenylalanine U-13C9, 15N                    | 787,977                             |
| L-Methionine U-13C5, 15N                       | 226,828                             |
| L-Isoleucine D10, 15N                          | 256,048                             |
| Guanosine U-15N5                               | 41,483                              |
| Panhotenic acid, Ca salt Monohydrate 13C3, 15N | 108,474                             |
| Cytosine U-13C2, 15N3                          | 31,055                              |

The mixed working solution for IST is prepared by taking equal volumes of each of the 12 individual IST intermediate solutions and mixing with vortex. For example, 100 µl of each IST intermediate solution is taken and mixed to get a total of 1.2 ml of IST working solution. The working solution is stored at +4°C.
